# Supplementary material for: Patterns of Racial and Socioeconomic Inclusivity of Hospital Care Among the Medicare Population
Source: bioRxiv or medRxiv preprint supplement (doi:10.1101/2021.05.24.21257551), 2022-03-30
Supplement: Supplementary file [file media-1.pdf]

Online supplement

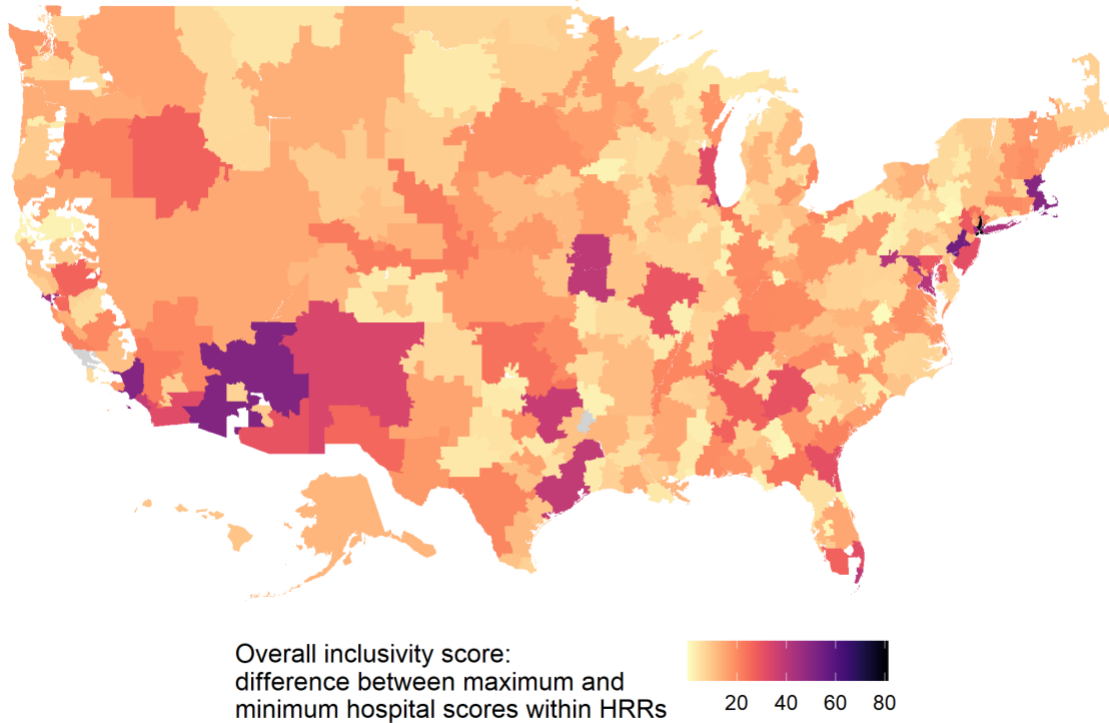

eFigure 1. The range of composite inclusivity scores within each HRR. (The Maximum - Minimum Inclusivity Scores x 100)

eTable 1. Summary statistics of the total hospital patients included within Community Area Radius (CA-R) by core-based statistical area (CBSA).

|                                  | Patients within CA-R (%) |                  |
|----------------------------------|--------------------------|------------------|
|                                  | <b>Median (IQR)</b>      | <b>Mean (SD)</b> |
| <b>All hospitals</b> (N = 3,548) | 90.1 (84.9, 93.2)        | 87.6 (8.7)       |
| <b>CBSA</b>                      |                          |                  |
| Metropolitan (N = 2,207)         | 89.4 (83.6, 93.0)        | 86.6 (9.7)       |
| Micropolitan                     | 92.0 (88.6, 94.4)        | 90.5 (5.8)       |
| Rural                            | 89.9 (85.5, 92.9)        | 88.4 (6.8)       |

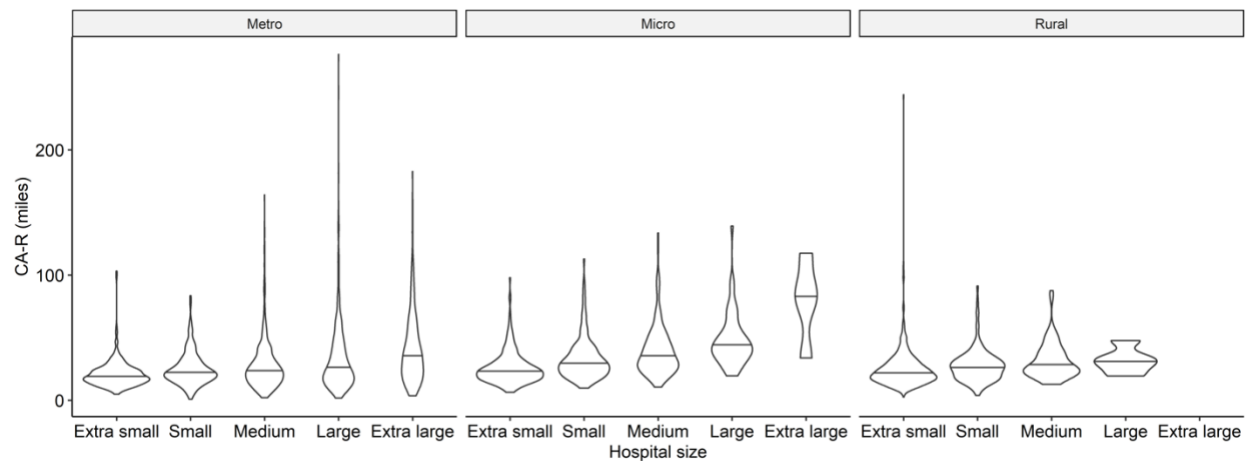

eFigure 2. Community Area Radius across core-based statistical area and hospital size. Density of results are represented by violin plots, with the median result for each group shown by the horizontal line.

eTable 2. Community area and hospital estimates of education levels, median income, and percentage of different racial groups based on data from zip code-level American Community survey data.

| Value                                 | Community area scores   |                |                 | Hospital scores         |                 |                 |
|---------------------------------------|-------------------------|----------------|-----------------|-------------------------|-----------------|-----------------|
|                                       | Median (IQR)            | Mean (SD)      | Range           | Median (IQR)            | Mean (SD)       | Range           |
| Education level                       | 3.9 (3.6, 4.1)          | 3.9 (0.4)      | 1.7, 5.4        | 3.8 (3.6, 4.1)          | 3.9 (0.4)       | 1.8, 5.6        |
| Median income (\$)                    | 43,416 (38,268, 50,107) | 44,787 (9,651) | 20,654, 100,507 | 42,144 (36,987, 48,644) | 43,919 (10,529) | 18,922, 109,680 |
| American Indian persons (%)           | 0.3 (0.1, 0.5)          | 0.6 (1.7)      | 0.0, 62.8       | 0.3 (0.1, 0.6)          | 0.7 (2.3)       | 0.0, 67.9       |
| Asian persons (%)                     | 1.0 (0.4, 2.4)          | 2.9 (6.0)      | 0.0, 70.5       | 0.8 (0.3, 2.1)          | 2.6 (5.9)       | 0.0, 69.6       |
| Black or African American persons (%) | 3.8 (0.7, 11.6)         | 8.4 (11.2)     | 0.0, 80.7       | 2.7 (0.5, 9.9)          | 8.0 (12.6)      | 0.0, 89.3       |
| Hispanic persons (%)                  | 1.9 (0.9, 6.4)          | 6.4 (11.3)     | 0.0, 99.0       | 1.7 (0.8, 5.6)          | 6.1 (11.7)      | 0.0, 98.3       |

| Value                                           | Community area scores |             |            | Hospital scores   |             |            |
|-------------------------------------------------|-----------------------|-------------|------------|-------------------|-------------|------------|
|                                                 | Median (IQR)          | Mean (SD)   | Range      | Median (IQR)      | Mean (SD)   | Range      |
| Other race reported (%)                         | 0.4 (0.1, 1.5)        | 1.5 (2.8)   | 0.0, 30.5  | 0.3 (0.1, 1.2)    | 1.4 (3.0)   | 0.0, 36.6  |
| Native Hawaiian or Pacific Islander persons (%) | 0.0 (0.0, 0.0)        | 0.1 (0.3)   | 0.0, 9.4   | 0.0 (0.0, 0.0)    | 0.1 (0.4)   | 0.0, 10.7  |
| Two or more races reported (%)                  | 0.8 (0.5, 1.2)        | 1.0 (0.9)   | 0.0, 14.5  | 0.8 (0.5, 1.3)    | 1.0 (1.0)   | 0.0, 14.8  |
| White, non-Hispanic persons (%)                 | 87.1 (72.7, 95.4)     | 81.0 (18.6) | 1.0, 100.0 | 89.3 (74.3, 96.1) | 81.8 (19.6) | 1.5, 100.0 |

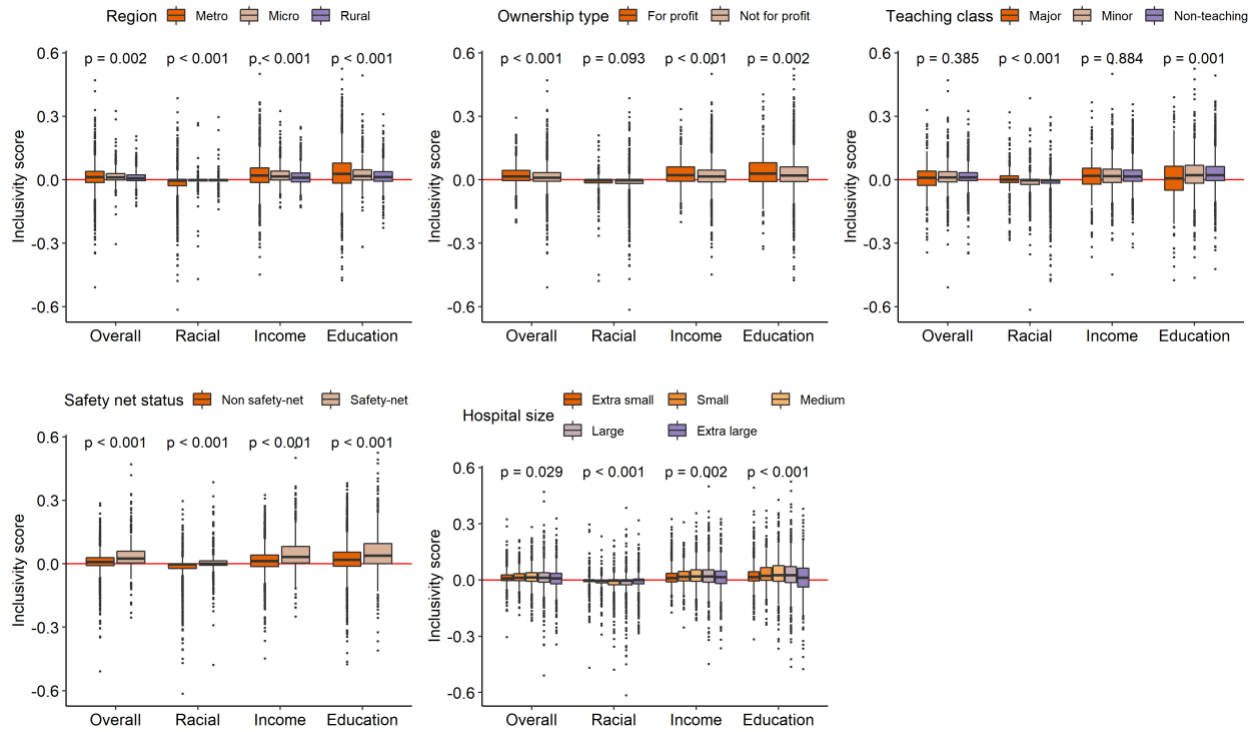

eFigure 3. Box plots of the three inclusivity scores (race, income and education) by hospital characteristics. CBSA: core-based statistical area.

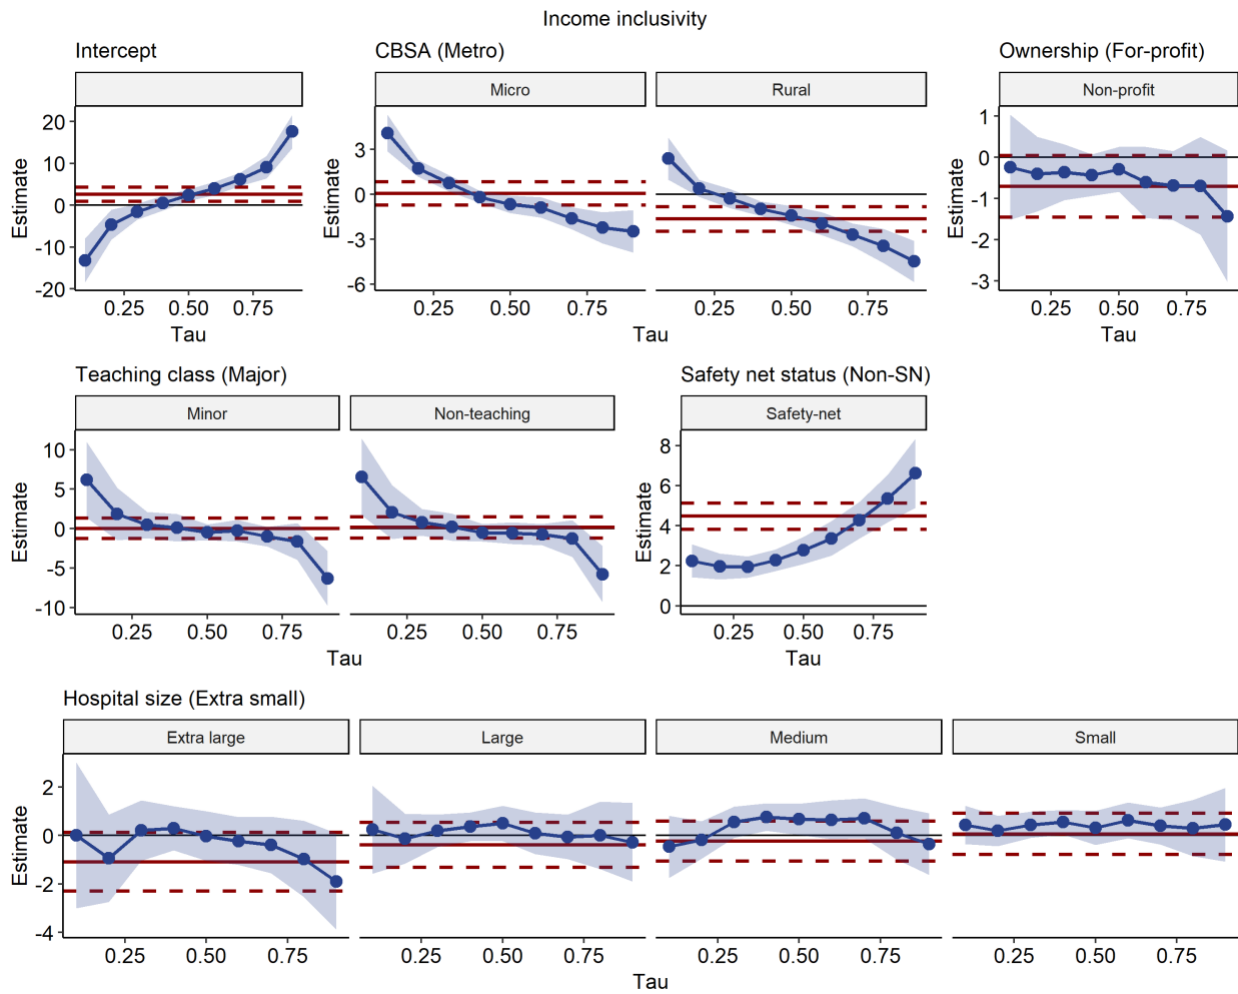

eFigure 4. Quantile regression results for income inclusivity scores.

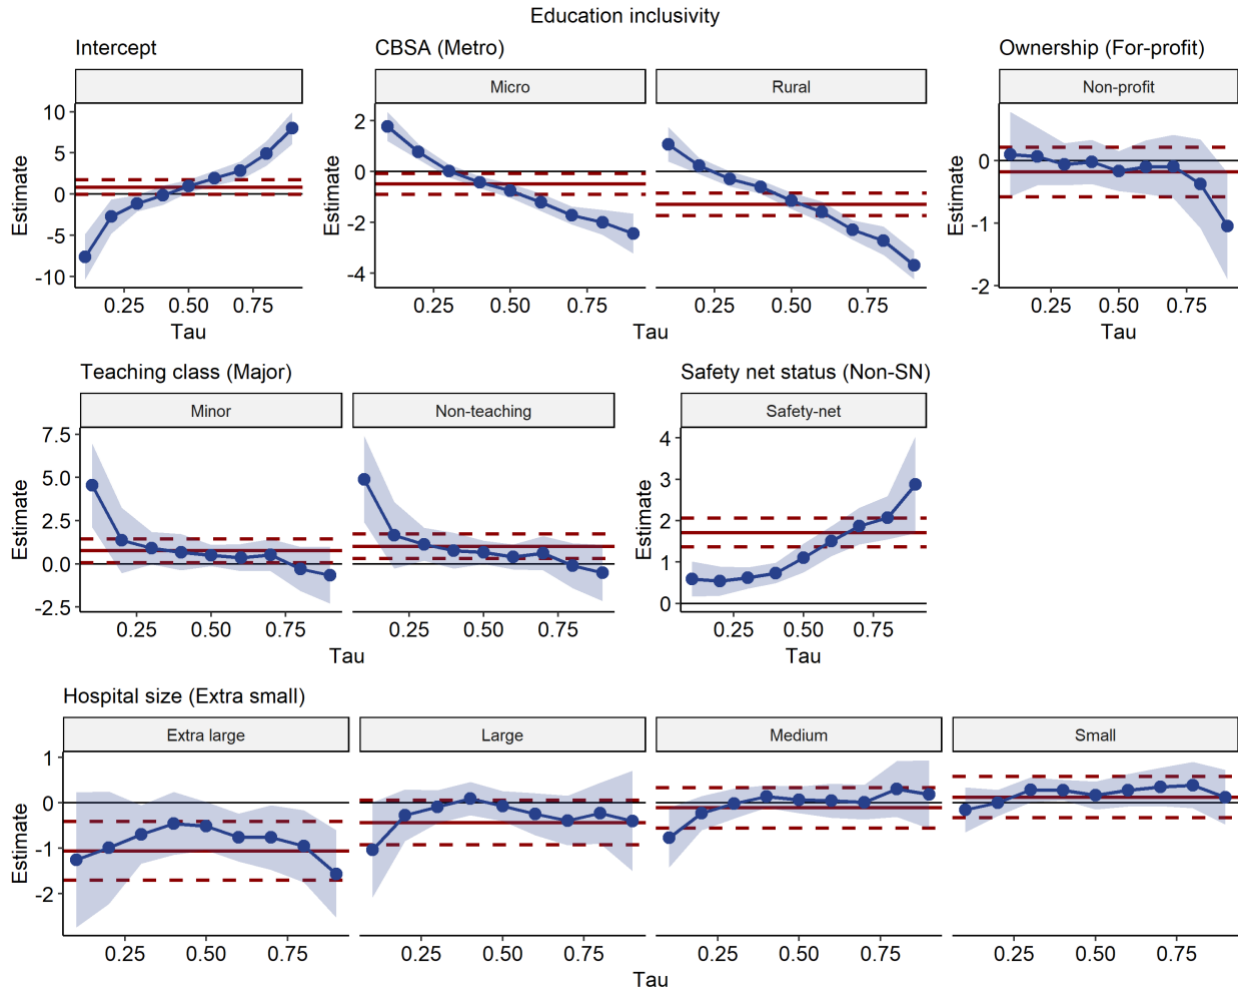

eFigure 5. Quantile regression results for education inclusivity scores.

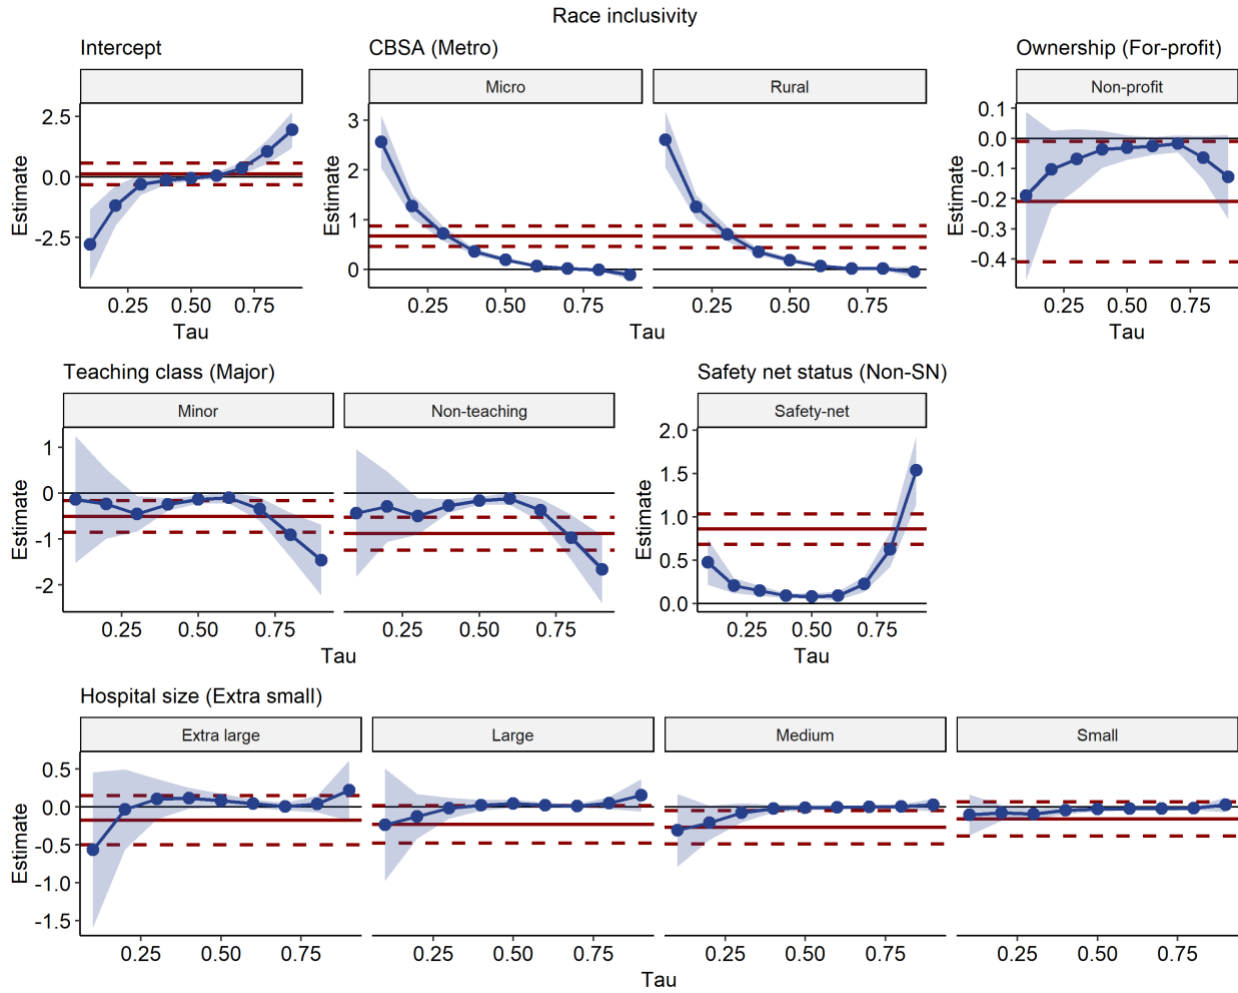

eFigure 6. Quantile regression results for racial inclusivity scores.

eTable 3. Comparison of inclusivity scores of safety net versus non-safety net hospitals in rural areas

| Characteristic        | Non-safety net hospitals, N = 535 | Safety net hospitals, N = 201 | p-value <sup>1</sup> |
|-----------------------|-----------------------------------|-------------------------------|----------------------|
| Overall inclusivity   |                                   |                               | 0.001                |
| Median (IQR)          | 0.4 (-0.6, 2.1)                   | 1.1 (-0.1, 2.8)               |                      |
| Mean (SD)             | 0.8 (3.0)                         | 1.6 (2.9)                     |                      |
| Racial inclusivity    |                                   |                               | 0.4                  |
| Median (IQR)          | 0.0 (-0.2, 0.0)                   | 0.0 (-0.2, 0.0)               |                      |
| Mean (SD)             | -0.1 (1.0)                        | 0.0 (0.9)                     |                      |
| Income inclusivity    |                                   |                               | 0.002                |
| Median (IQR)          | 0.7 (-1.7, 3.6)                   | 2.0 (-0.3, 5.1)               |                      |
| Mean (SD)             | 1.3 (5.1)                         | 2.6 (5.3)                     |                      |
| Education inclusivity |                                   |                               | 0.007                |
| Median (IQR)          | 0.5 (-0.4, 1.7)                   | 0.9 (-0.1, 2.3)               |                      |
| Mean (SD)             | 0.7 (2.6)                         | 1.3 (2.5)                     |                      |

<sup>1</sup>Welch Two Sample t-test



eTable 4. The unadjusted and adjusted 10<sup>th</sup>, 50<sup>th</sup> and 90<sup>th</sup> percentile inclusivity score estimates.

| Hospital characteristic          | 10 <sup>th</sup> percentile |                    | 50 <sup>th</sup> percentile |                | 90 <sup>th</sup> percentile |                   |
|----------------------------------|-----------------------------|--------------------|-----------------------------|----------------|-----------------------------|-------------------|
|                                  | Unadjusted                  | Adjusted (CI)      | Unadjusted                  | Adjusted (CI)  | Unadjusted                  | Adjusted (CI)     |
| <b>Overall inclusivity score</b> |                             |                    |                             |                |                             |                   |
| Hospital size                    |                             |                    |                             |                |                             |                   |
| Extra small                      | -1.8                        | -3.8 (-5.4, -2.2)  | 0.8                         | 1.7 (1.2, 2.1) | 5.2                         | 9.2 (7.8, 10.6)   |
| Small                            | -2.4                        | -3.7 (-5.3, -2.1)  | 1.1                         | 1.8 (1.3, 2.2) | 6.2                         | 9.6 (8.2, 11)     |
| Medium                           | -4.4                        | -4.1 (-5.8, -2.3)  | 1.3                         | 1.8 (1.4, 2.3) | 7.4                         | 9.1 (7.8, 10.4)   |
| Large                            | -6.2                        | -5.0 (-6.8, -3.1)  | 1.2                         | 1.7 (1.2, 2.2) | 7.7                         | 8.8 (7.4, 10.3)   |
| Extra large                      | -8.7                        | -5.3 (-8.2, -2.4)  | 0.8                         | 1.4 (0.9, 1.9) | 7.1                         | 7.6 (6.1, 9)      |
| CBSA type                        |                             |                    |                             |                |                             |                   |
| Metro                            | -6.1                        | -6.4 (-7.8, -5.0)  | 1.2                         | 2.0 (1.7, 2.4) | 7.7                         | 10.2 (9.1, 11.4)  |
| Micro                            | -1.3                        | -3.0 (-4.4, -1.6)  | 1.1                         | 1.8 (1.3, 2.2) | 5.5                         | 8.8 (7.5, 10.1)   |
| Rural                            | -1.8                        | -3.7 (-5.1, -2.2)  | 0.6                         | 1.2 (0.8, 1.7) | 4.2                         | 7.6 (6.2, 8.9)    |
| Ownership                        |                             |                    |                             |                |                             |                   |
| For-profit                       | -4.0                        | -4.4 (-5.9, -2.8)  | 1.5                         | 1.8 (1.4, 2.3) | 8.3                         | 9.3 (7.9, 10.8)   |
| Non-profit                       | -3.9                        | -4.3 (-5.6, -3.1)  | 0.9                         | 1.5 (1.2, 1.9) | 6.3                         | 8.4 (7.3, 9.5)    |
| Teaching class                   |                             |                    |                             |                |                             |                   |
| Major                            | -10.9                       | -7.5 (-11.5, -3.6) | 1.0                         | 1.7 (0.8, 2.6) | 9.6                         | 11.5 (8.7, 14.4)  |
| Minor                            | -5.1                        | -2.8 (-3.8, -1.8)  | 1.0                         | 1.7 (1.4, 2.0) | 7.3                         | 7.7 (6.7, 8.7)    |
| Non-teaching                     | -3.0                        | -2.7 (-3.6, -1.8)  | 1.0                         | 1.6 (1.4, 1.9) | 6.0                         | 7.3 (6.5, 8.1)    |
| Safety net status                |                             |                    |                             |                |                             |                   |
| Non-safety net                   | -4.4                        | -5.2 (-6.5, -3.8)  | 0.8                         | 0.8 (0.5, 1.1) | 5.5                         | 6.5 (5.4, 7.6)    |
| Safety net                       | -1.9                        | -3.6 (-4.9, -2.2)  | 2.5                         | 2.6 (2.1, 3.1) | 10.4                        | 11.2 (9.7, 12.7)  |
| <b>Income inclusivity score</b>  |                             |                    |                             |                |                             |                   |
| Hospital size                    |                             |                    |                             |                |                             |                   |
| Extra small                      | -3.7                        | -5.7 (-7.6, -3.8)  | 1.2                         | 2.6 (2.0, 3.3) | 9.6                         | 13.9 (11.9, 15.8) |
| Small                            | -3.6                        | -5.3 (-7.3, -3.3)  | 2.0                         | 2.9 (2.2, 3.7) | 10.8                        | 14.3 (12.2, 16.4) |
| Medium                           | -6.3                        | -6.2 (-8.2, -4.2)  | 2.4                         | 3.3 (2.6, 3.9) | 12.1                        | 13.5 (11.6, 15.4) |
| Large                            | -6.5                        | -5.5 (-7.6, -3.4)  | 2.4                         | 3.1 (2.4, 3.8) | 11.9                        | 13.6 (11.7, 15.5) |
| Extra large                      | -9.5                        | -5.7 (-8.3, -3.2)  | 1.9                         | 2.6 (1.8, 3.3) | 11.9                        | 12.0 (10.0, 14.0) |

| Hospital characteristic            | 10 <sup>th</sup> percentile |                    | 50 <sup>th</sup> percentile |                | 90 <sup>th</sup> percentile |                   |
|------------------------------------|-----------------------------|--------------------|-----------------------------|----------------|-----------------------------|-------------------|
|                                    | Unadjusted                  | Adjusted (CI)      | Unadjusted                  | Adjusted (CI)  | Unadjusted                  | Adjusted (CI)     |
| <b>CBSA type</b>                   |                             |                    |                             |                |                             |                   |
| Metro                              | -7.2                        | -7.9 (-9.6, -6.1)  | 2.3                         | 3.6 (3.1, 4.1) | 12.6                        | 15.8 (14.2, 17.4) |
| Micro                              | -2.3                        | -3.8 (-5.5, -2.0)  | 1.8                         | 2.9 (2.3, 3.6) | 9.4                         | 13.3 (11.4, 15.2) |
| Rural                              | -3.8                        | -5.5 (-7.3, -3.6)  | 1.1                         | 2.2 (1.5, 2.8) | 7.6                         | 11.3 (9.3, 13.3)  |
| <b>Ownership</b>                   |                             |                    |                             |                |                             |                   |
| For-profit                         | -5.2                        | -5.6 (-7.3, -3.8)  | 2.6                         | 3.1 (2.3, 3.8) | 13.0                        | 14.2 (12.2, 16.2) |
| Non-profit                         | -5.4                        | -5.8 (-7.5, -4.2)  | 1.8                         | 2.8 (2.3, 3.2) | 10.5                        | 12.7 (11.2, 14.3) |
| <b>Teaching class</b>              |                             |                    |                             |                |                             |                   |
| Major                              | -13.0                       | -9.9 (-14.8, -5.0) | 2.2                         | 3.2 (2.2, 4.3) | 14.8                        | 17.5 (13.7, 21.2) |
| Minor                              | -6.6                        | -3.8 (-5.0, -2.6)  | 2.0                         | 2.8 (2.2, 3.3) | 11.6                        | 11.2 (9.8, 12.6)  |
| Non-teaching                       | -4.4                        | -3.4 (-4.1, -2.6)  | 1.9                         | 2.7 (2.3, 3.2) | 10.6                        | 11.7 (10.5, 12.9) |
| <b>Safety net status</b>           |                             |                    |                             |                |                             |                   |
| Non-safety net                     | -6.0                        | -6.8 (-8.5, -5.1)  | 1.5                         | 1.5 (1.1, 2)   | 9.3                         | 10.2 (8.7, 11.6)  |
| Safety net                         | -2.9                        | -4.6 (-6.3, -2.8)  | 3.9                         | 4.3 (3.6, 5)   | 16.6                        | 16.8 (14.6, 18.9) |
| <b>Education inclusivity score</b> |                             |                    |                             |                |                             |                   |
| <b>Hospital size</b>               |                             |                    |                             |                |                             |                   |
| Extra small                        | -1.4                        | -3.2 (-4.2, -2.1)  | 0.8                         | 1.2 (0.8, 1.6) | 5.0                         | 6.5 (5.6, 7.4)    |
| Small                              | -1.7                        | -3.3 (-4.4, -2.3)  | 1.2                         | 1.4 (1, 1.7)   | 5.9                         | 6.6 (5.7, 7.5)    |
| Medium                             | -2.7                        | -3.9 (-5.0, -2.9)  | 1.3                         | 1.3 (0.9, 1.6) | 6.9                         | 6.7 (5.7, 7.7)    |
| Large                              | -3.9                        | -4.2 (-5.4, -3.0)  | 1.3                         | 1.1 (0.7, 1.5) | 6.9                         | 6.1 (4.9, 7.3)    |
| Extra large                        | -5.4                        | -4.4 (-5.7, -3.1)  | 0.6                         | 0.7 (0.2, 1.1) | 5.8                         | 4.9 (3.9, 6.0)    |
| <b>CBSA type</b>                   |                             |                    |                             |                |                             |                   |
| Metro                              | -3.8                        | -4.7 (-5.7, -3.8)  | 1.4                         | 1.8 (1.5, 2.1) | 6.9                         | 8.2 (7.5, 8.9)    |
| Micro                              | -1.0                        | -3.0 (-4.0, -2.0)  | 0.9                         | 1.0 (0.7, 1.3) | 4.8                         | 5.8 (4.8, 6.8)    |
| Rural                              | -1.4                        | -3.7 (-4.7, -2.7)  | 0.6                         | 0.6 (0.3, 1.0) | 3.4                         | 4.5 (3.7, 5.4)    |
| <b>Ownership</b>                   |                             |                    |                             |                |                             |                   |
| For-profit                         | -3.0                        | -3.9 (-4.9, -2.8)  | 1.4                         | 1.2 (0.8, 1.6) | 7.1                         | 6.7 (5.8, 7.6)    |
| Non-profit                         | -2.7                        | -3.7 (-4.7, -2.8)  | 1.0                         | 1 (0.8, 1.3)   | 5.8                         | 5.7 (4.9, 6.4)    |
| <b>Teaching class</b>              |                             |                    |                             |                |                             |                   |
| Major                              | -8.4                        | -6.9 (-9.7, -4.2)  | 0.3                         | 0.7 (0.1, 1.4) | 6.6                         | 6.6 (5.2, 8)      |

| Hospital characteristic         | 10 <sup>th</sup> percentile |                   | 50 <sup>th</sup> percentile |                   | 90 <sup>th</sup> percentile |                |
|---------------------------------|-----------------------------|-------------------|-----------------------------|-------------------|-----------------------------|----------------|
|                                 | Unadjusted                  | Adjusted (CI)     | Unadjusted                  | Adjusted (CI)     | Unadjusted                  | Adjusted (CI)  |
| Minor                           | -3.7                        | -2.4 (-3, -1.9)   | 1.1                         | 1.2 (0.9, 1.5)    | 6.7                         | 5.9 (5.1, 6.7) |
| Non-teaching                    | -2.0                        | -2 (-2.5, -1.6)   | 1.1                         | 1.4 (1.2, 1.6)    | 5.9                         | 6.0 (5.3, 6.7) |
| Safety net status               |                             |                   |                             |                   |                             |                |
| Non-safety net                  | -3.0                        | -4.1 (-5, -3.2)   | 0.9                         | 0.6 (0.3, 0.8)    | 5.4                         | 4.7 (4.2, 5.3) |
| Safety net                      | -1.6                        | -3.5 (-4.5, -2.5) | 1.9                         | 1.7 (1.3, 2.1)    | 8.7                         | 7.6 (6.4, 8.8) |
| <b>Racial inclusivity score</b> |                             |                   |                             |                   |                             |                |
| Hospital size                   |                             |                   |                             |                   |                             |                |
| Extra small                     | -1.1                        | -1.1 (-1.8, -0.4) | 0.0                         | 0 (0, 0)          | 0.2                         | 1.6 (1.3, 1.8) |
| Small                           | -1.6                        | -1.2 (-1.9, -0.5) | -0.1                        | 0 (-0.1, 0)       | 0.2                         | 1.6 (1.3, 1.9) |
| Medium                          | -2.8                        | -1.4 (-2.1, -0.8) | -0.1                        | 0 (-0.1, 0)       | 0.5                         | 1.6 (1.3, 1.9) |
| Large                           | -3.2                        | -1.3 (-2.1, -0.6) | -0.1                        | 0 (0, 0.1)        | 0.9                         | 1.7 (1.4, 2)   |
| Extra large                     | -3.6                        | -1.7 (-2.7, -0.6) | 0.0                         | 0.1 (0, 0.1)      | 1.6                         | 1.8 (1.4, 2.1) |
| CBSA type                       |                             |                   |                             |                   |                             |                |
| Metro                           | -3.5                        | -3.1 (-3.7, -2.4) | -0.2                        | -0.1 (-0.1, -0.1) | 0.8                         | 1.7 (1.4, 2)   |
| Micro                           | -0.6                        | -0.5 (-1.1, 0.1)  | 0.0                         | 0.1 (0.1, 0.1)    | 0.2                         | 1.6 (1.3, 1.8) |
| Rural                           | -0.6                        | -0.5 (-1.1, 0.1)  | 0.0                         | 0.1 (0.0, 0.1)    | 0.2                         | 1.6 (1.4, 1.9) |
| Ownership                       |                             |                   |                             |                   |                             |                |
| For-profit                      | -2.0                        | -1.3 (-1.9, -0.6) | -0.1                        | 0.0 (0.0, 0.1)    | 0.9                         | 1.7 (1.4, 2)   |
| Non-profit                      | -2.4                        | -1.4 (-2, -0.9)   | -0.1                        | 0.0 (0.0, 0.0)    | 0.5                         | 1.6 (1.3, 1.8) |
| Teaching class                  |                             |                   |                             |                   |                             |                |
| Major                           | -3.2                        | -1.2 (-2.9, 0.6)  | 0.0                         | 0.1 (0.1, 0.2)    | 2.3                         | 2.7 (2.2, 3.2) |
| Minor                           | -2.8                        | -1.3 (-1.6, -1.0) | -0.1                        | 0.0 (-0.1, 0.0)   | 0.8                         | 1.2 (1.0, 1.5) |
| Non-teaching                    | -2.0                        | -1.6 (-1.9, -1.3) | -0.1                        | 0.0 (-0.1, 0.0)   | 0.3                         | 1.0 (0.8, 1.2) |
| Safety net status               |                             |                   |                             |                   |                             |                |
| Non-safety net                  | -2.6                        | -1.6 (-2.2, -1.0) | -0.1                        | 0.0 (-0.1, 0.0)   | 0.3                         | 0.9 (0.7, 1.0) |
| Safety net                      | -1.2                        | -1.1 (-1.7, -0.5) | 0.0                         | 0.1 (0.0, 0.1)    | 2.0                         | 2.4 (2.0, 2.8) |

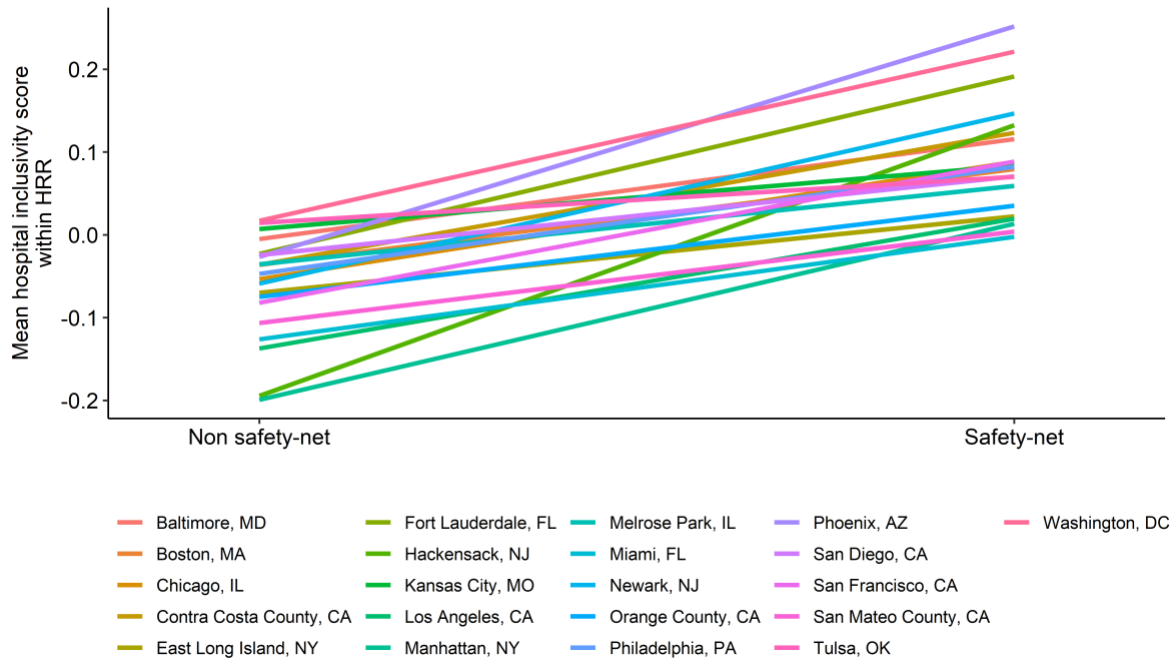

eFigure 7. The mean overall inclusivity scores for safety net hospitals and non-safety net hospitals for selected hospital referral regions (HRR). These are the HRRs where there was a significant slope coefficient for safety net status in a multi-level regression with HRR as a random effect.

## Results of Quantile Regression for Each Inclusivity Measure

### Income Inclusivity

At the 90<sup>th</sup> percentile of income inclusivity scores (eFigure 4) major teaching versus non-teaching was 4.2 points greater (adjusted 5.9, CI: 1.4 to 10.2;  $p = 0.006$ ) and 3.2 points greater (adjusted 6.3, CI: 1.4 to 10.2;  $p = 0.002$ ) versus minor teaching hospitals. Hospitals at the lowest 10<sup>th</sup> percentile of income inclusivity scores tended to be metro-area and major teaching hospitals. The 10<sup>th</sup> percentile score difference was -8.6 points for non-teaching (adjusted -6.6, CI: -12.7 to -0.5;  $p = 0.032$ ) and -6.4 points for minor teaching (adjusted -6.2, CI: -12.3 to -0.1;  $p = 0.044$ ) hospitals.

### Education Inclusivity

For education inclusivity (eFigure 5), the hospitals with the highest 90<sup>th</sup> percentile scores were metro-area, for-profit and safety net. The difference in the 90<sup>th</sup> percentile education score for for-profit versus non-profit hospitals was 1.3 points (adjusted 1.0, CI: 0.3 to 1.8,  $p = 0.004$ ). The hospitals with the lowest 10<sup>th</sup> percentile education inclusivity scores were metro-area, non-safety net hospitals and major teaching hospitals. The difference in the 10<sup>th</sup> percentile education inclusivity score for major teaching hospitals versus minor was -4.8 points (adjusted -4.5, CI: -7.9 to -1.2 points;  $p = 0.004$ ) and was -6.4 points (-4.9, CI: -8.3 to -1.5;  $p = 0.002$ ) for non-teaching hospitals.

### Racial Inclusivity

Safety net hospitals and major teaching hospitals were prominent at the highest 90<sup>th</sup> percentile of scores for racial inclusivity (eFigure 6).

Unlike the income and education scores, at the 90<sup>th</sup> percentile scores for race, there were no differences between metro micro or rural areas. There were differences in racial inclusivity by teaching status at the

90<sup>th</sup> percentile: major teaching hospitals were 1.5 points higher than minor teaching hospitals (adjusted 1.5, CI: 0.8 to 2.1;  $p < 0.001$ ), and 2.0 points higher than non-teaching hospitals (adjusted 1.7, CI: 1.1 to 2.3;  $p = 0.025$ ).

The hospitals with the lowest 10<sup>th</sup> percentile racial inclusivity scores were metro-area hospitals and non-safety net hospitals. The difference in the 10<sup>th</sup> percentile score for metro- versus rural area hospitals was -2.9 points (adjusted -2.6, CI: -3.2 to -2.0;  $p < 0.001$ ), and versus micro-area hospitals was -2.9 points (adjusted -2.6, CI: -3.1 to -2.0;  $p < 0.001$ ).
